# Supplementary material for: A convergent evolutionary pathway attenuating cellulose production drives enhanced virulence of some bacteria
Source: PubMed Central journal article supplement (PMC10881479; doi:10.1038/s41467-024-45176-4), 2024-02-21
Supplement: 41467_2024_45176_MOESM1_ESM.pdf [file 41467_2024_45176_MOESM1_ESM.pdf]

**A convergent evolutionary pathway attenuating cellulose production drives enhanced virulence in some bacteria**

Nguyen Thi Khanh Nhu<sup>1,2,3#</sup>, M Arifur Rahman<sup>3,4#a</sup>, Kelvin G. K. Goh<sup>5,6#</sup>, Seung Jae Kim<sup>7,8#</sup>, Minh-Duy Phan<sup>1,2,3</sup>, Kate M. Peters<sup>1,2,3</sup>, Laura Alvarez-Fraga<sup>2,3b</sup>, Steven J. Hancock<sup>2,3c</sup>, Chitra Ravi<sup>1,2,3</sup>, Timothy J. Kidd<sup>2,3d</sup>, Matthew J. Sullivan<sup>5,6e</sup>, Katharine M. Irvine<sup>3,4</sup>, Scott A. Beatson<sup>2,3</sup>, Matthew J. Sweet<sup>1,3</sup>, Adam D. Irwin<sup>3,9,10</sup>, Jana Vukovic<sup>7,8\*</sup>, Glen C. Ulett<sup>5,6\*</sup>, Sumaira Z. Hasnain<sup>3,4\*</sup>, and Mark A. Schembri<sup>1,2,3\*</sup>

<sup>1</sup>*Institute for Molecular Bioscience (IMB), The University of Queensland, Brisbane, Queensland, Australia*

<sup>2</sup>*School of Chemistry and Molecular Biosciences, The University of Queensland, Brisbane, Queensland, Australia*

<sup>3</sup>*Australian Infectious Diseases Research Centre, The University of Queensland, Brisbane, Queensland, Australia*

<sup>4</sup>*Immunopathology Group, Mater Research Institute, The University of Queensland, Translational Research Institute, Brisbane, Australia.*

<sup>5</sup>*School of Pharmacy and Medical Sciences, Griffith University, Southport, Queensland, Australia*

<sup>6</sup>*Menzies Health Institute Queensland, Griffith University, Southport, Queensland, Australia*

<sup>7</sup>*School of Biomedical Sciences, Faculty of Medicine, The University of Queensland, Brisbane, Queensland, Australia*

<sup>8</sup>*Queensland Brain Institute, The University of Queensland, Brisbane, Queensland, Australia*

<sup>9</sup>*University of Queensland Centre for Clinical Research, Brisbane, Australia*

<sup>10</sup>*Queensland Children's Hospital, Brisbane, Australia*

# Contributed equally

26 <sup>a</sup>Current Address: QIMR Berghofer Medical Research Institute, Brisbane, Queensland, Australia.

27 <sup>b</sup>Current Address: INRAE, Univ Montpellier, LBE, 102 Avenue des Etangs, Narbonne 11100, France.

28 <sup>c</sup>Current Address: Wellcome-Wolfson Institute for Experimental Medicine, School of Medicine, Dentistry  
29 and Biomedical Sciences, Queen's University Belfast, Belfast, United Kingdom.

30 <sup>d</sup>Current Address: Central Microbiology, Pathology Queensland, Royal Brisbane and Women's Hospital,  
31 Brisbane, Australia.

32 <sup>e</sup>Current Address: School of Biological Sciences, University of East Anglia, Norwich, NR4 7TJ, UK.

33

34 **\*Corresponding authors**

35 **Mark Schembri:** Institute for Molecular Bioscience (IMB), The University of Queensland, Brisbane,  
36 Queensland 4072, Australia. Telephone: +61733653306; E-mail: [m.schembri@uq.edu.au](mailto:m.schembri@uq.edu.au)

37

38 **Sumaira Z. Hasnain:** Immunopathology Group, Mater Research Institute, The University of Queensland,  
39 Translational Research Institute, Brisbane, Australia. Telephone: +61734436939; E-mail:  
40 [sumaira.hasnain@mater.uq.edu.au](mailto:sumaira.hasnain@mater.uq.edu.au)

41

42 **Glen Ulett:** School of Pharmacy and Medical Sciences, and Menzies Health Institute Queensland, Griffith  
43 University, Gold Coast, QLD 4222, Australia. Telephone: +61756780765; E-mail: [g.ulett@griffith.edu.au](mailto:g.ulett@griffith.edu.au)

44

45 **Jana Vukovic:** School of Biomedical Sciences, Faculty of Medicine, The University of Queensland,  
46 Brisbane, Queensland, Australia. Telephone: + 61733652818; E-mail: [j.vukovic@uq.edu.au](mailto:j.vukovic@uq.edu.au)

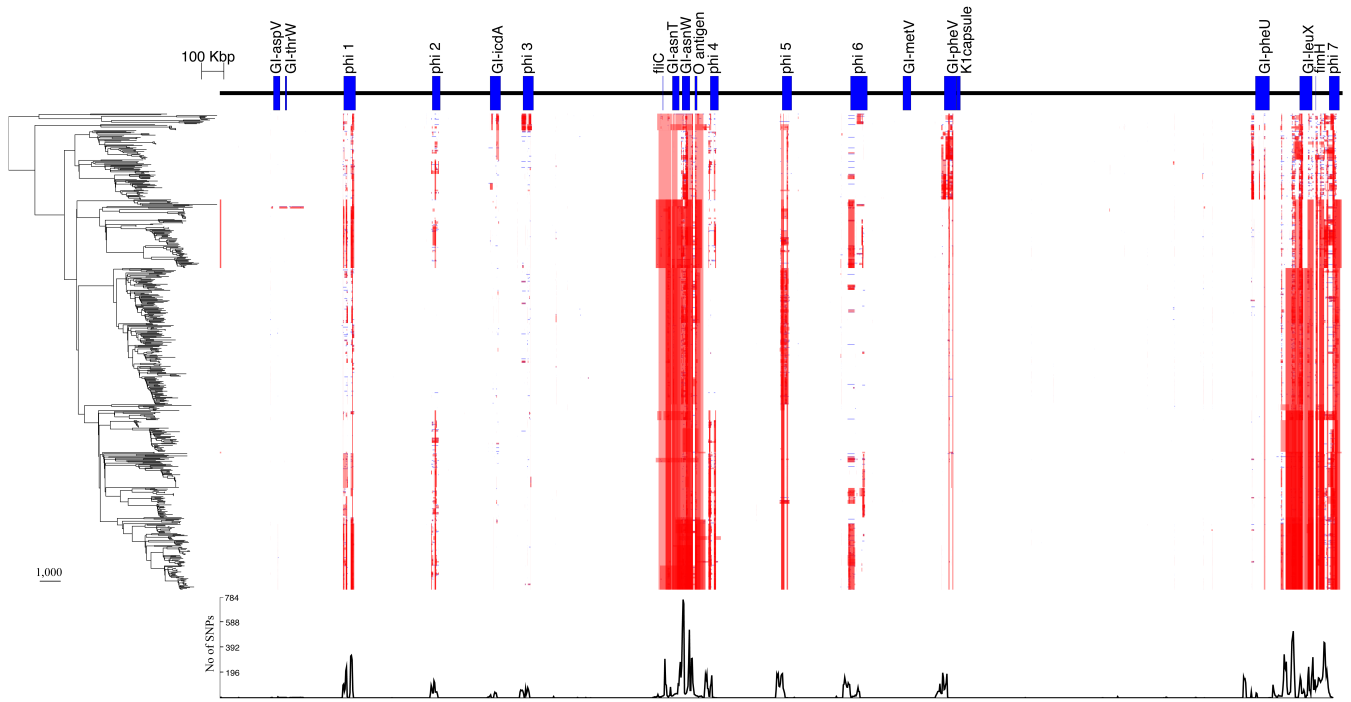

47

48 **Supplementary Fig 1. Recombination regions in ST95.** Gubbins analysis of ST95 whole genome  
 49 alignment built by integrating SNPs in each strain to the MS7163 chromosome backbone (red,  
 50 recombination detected in several isolates; blue, recombination specific to its taxa. Left panel represents  
 51 the phylogenetic tree of ST95, top panel is MS7163 chromosome annotated with GIs, prophages and regions  
 52 of interest. The middle section shows the number of SNPs according to the MS7163 chromosome backbone.  
 53 Source data are provided as a Source Data file.

54

55

56

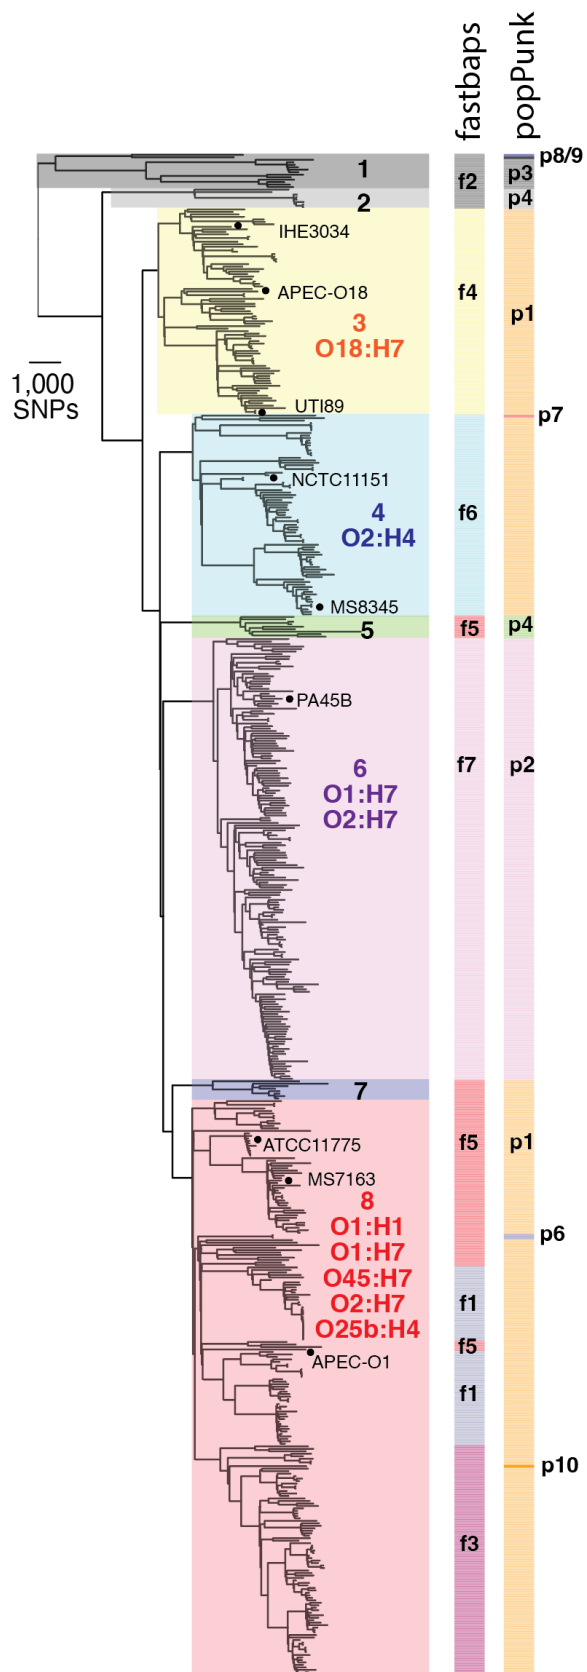

57

58 **Supplementary Fig 2.** ST95 clade designation by SNP phylogeny and population structure analysis by  
 59 fastbaps and popPunk.

60

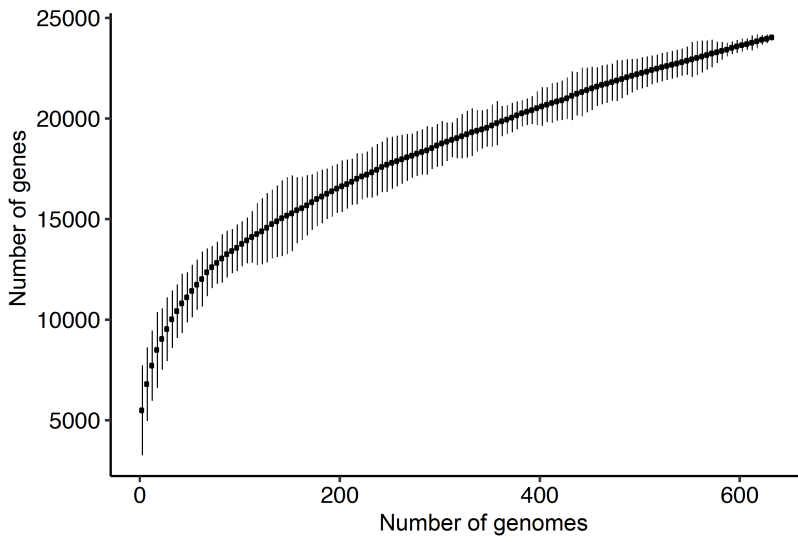

61

62 **Supplementary Fig 3. ST95 pangenome accumulation plot.** Plot of point range (mean +/- min, max,

63 binwidth = 5) of number of genes in pan genome.

64

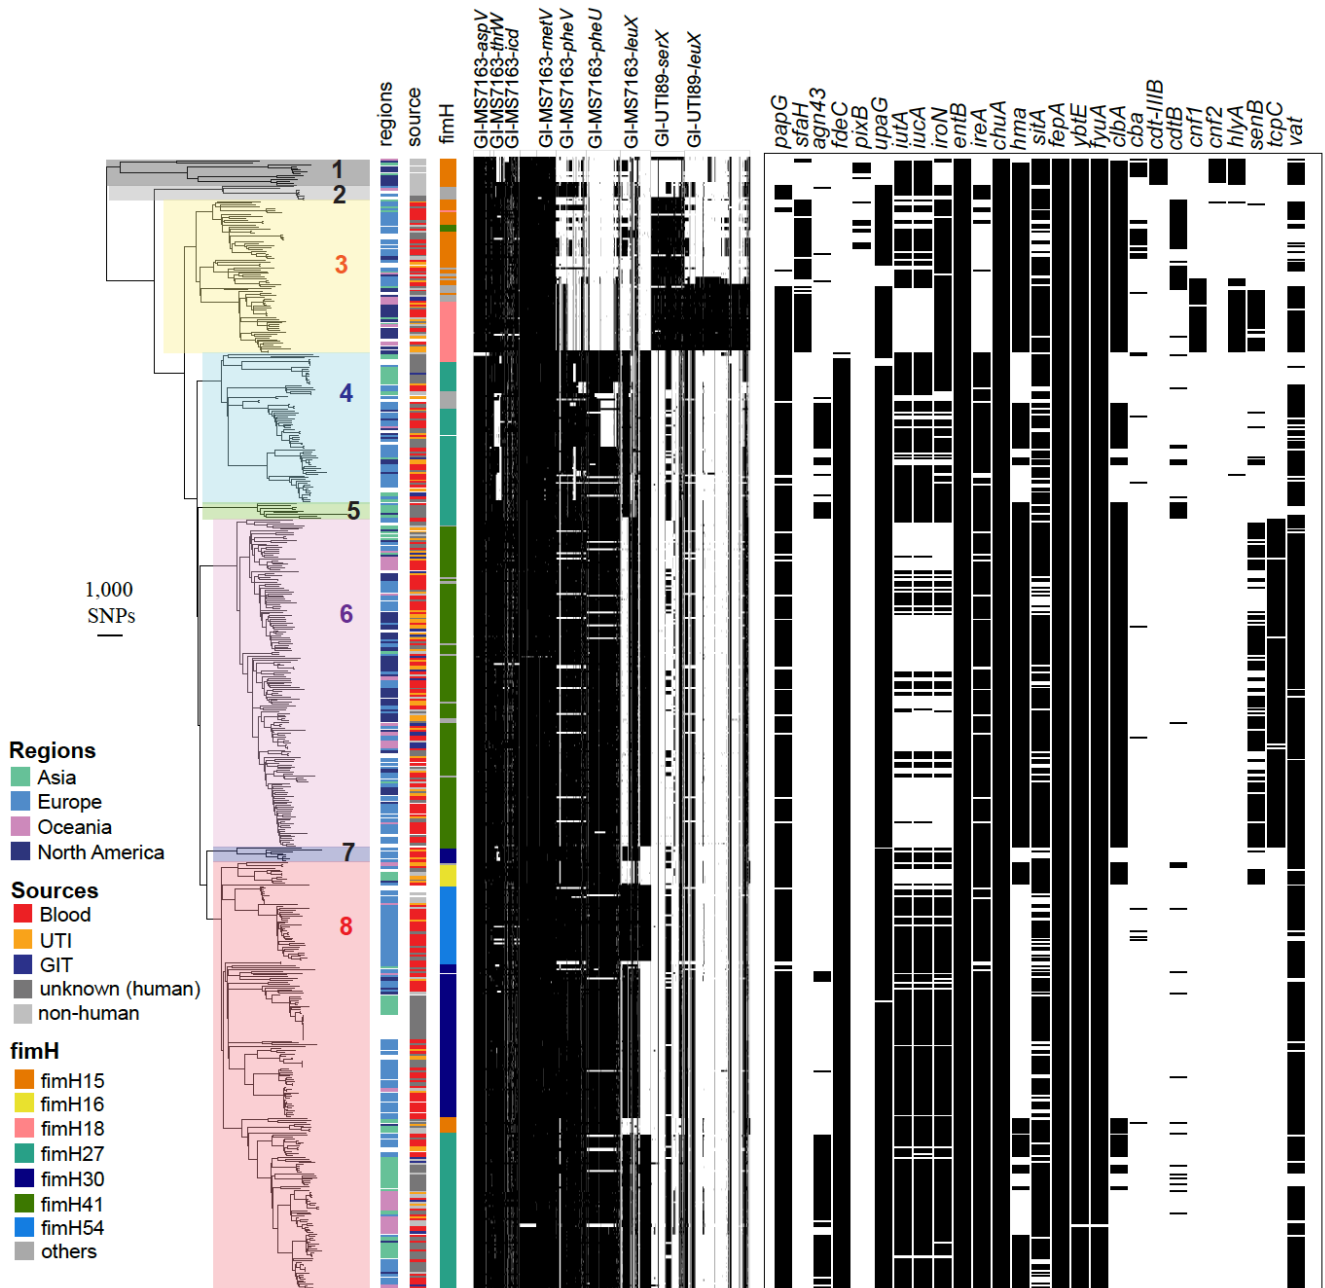

65

66 **Supplementary Fig 4. Phylogeny of ST95 contextualized with respect to geographic origin, source,**  
 67 **genomic islands and virulence factors.** The isolation region and source of ST95 strains are color-coded  
 68 according to keys (UTI, urinary tract infection; GIT, gastrointestinal tract infection). Conservation of GIs  
 69 from MS7163 and UTI89 in ST95 is shown, with black lines indicating a match of >90% nucleotide  
 70 conservation based on a blast search of ST95 assemblies against the reference with a 200-bp window  
 71 (generated using seqfindr). The prevalence of selected *E. coli* virulence genes is also shown, with black  
 72 lines indicating gene presence with > 90% nucleotide identity and > 80% gene coverage.

73

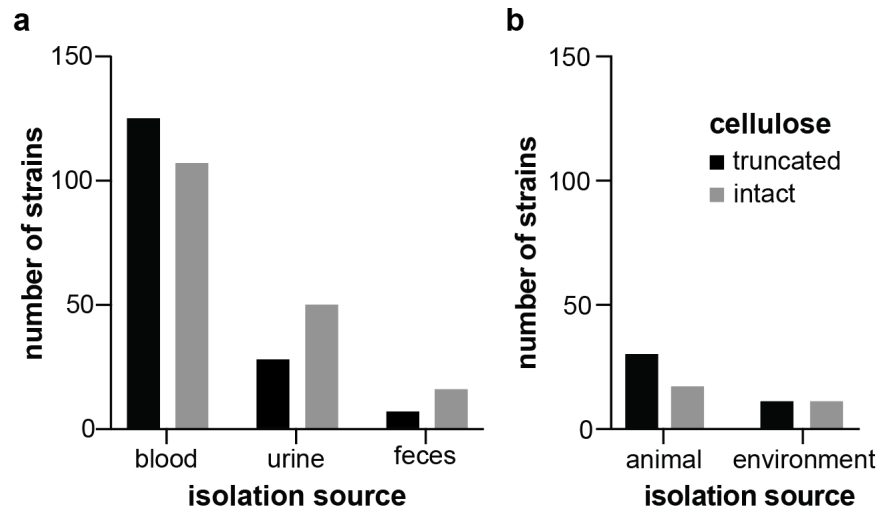

74

75

76 **Supplementary Fig 5. Cellulose disruption is significantly associated with ST95 blood isolates**  
 77 **compared to urine and fecal isolates. a**, Number of ST95 isolates in our dataset that contain mutations in  
 78 cellulose biosynthesis or modification based on their site of isolation (blood, urine and feces). In total, there  
 79 were 333 human isolates for which there was appropriate metadata, comprising 232 blood, 78 urine and 23  
 80 fecal isolates. Statistical analysis revealed significant association between cellulose disruption in blood  
 81 isolates compared to urine and fecal isolates (Chi-square test, 2 tailed P-value = 0.0049). **b**, Number of  
 82 ST95 isolates originating from animals or the environment in our dataset that contain mutations in cellulose  
 83 biosynthesis or modification. In total, there were 47 animal isolates and 22 environmental isolates. No  
 84 significant associations were identified (Chi-square test, 2 tailed P-value = 0.3). Source data are provided  
 85 as a Source Data file.

86

87

88

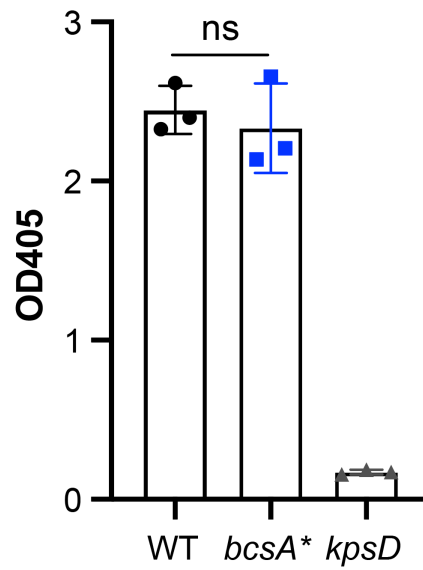

89

90

91

92

**Supplementary Fig 6.** WT and *bcsA\** produce the same amount of K1 capsule. K1 capsule production was determined by ELISA using a monoclonal antibody specific for K1 ELISA. Data was shown as mean  $\pm$  SD of three biological replicates. Source data are provided as a Source Data file.



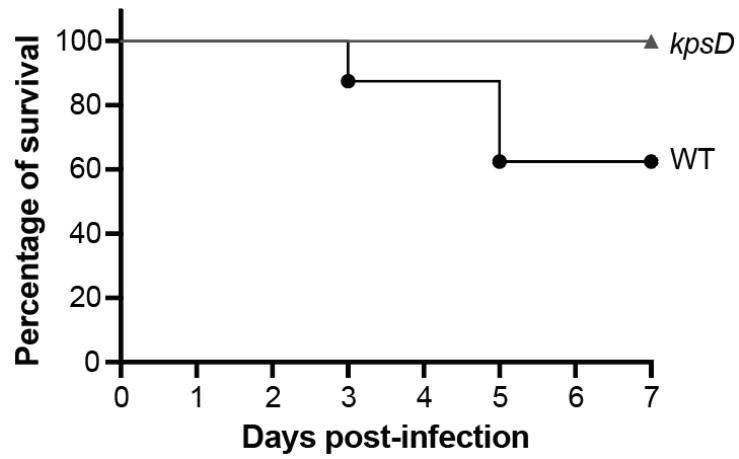

93

94

95

96

97

**Supplementary Fig 7.** Percentage of survival of pups during the 7-day infection period following infection at day 2 post birth (P2). Rat pups were infected with WT MS7163 (8 pups) or MS7163*kpsD* (a K1 capsule mutant, 7 pups). Source data are provided as a Source Data file.

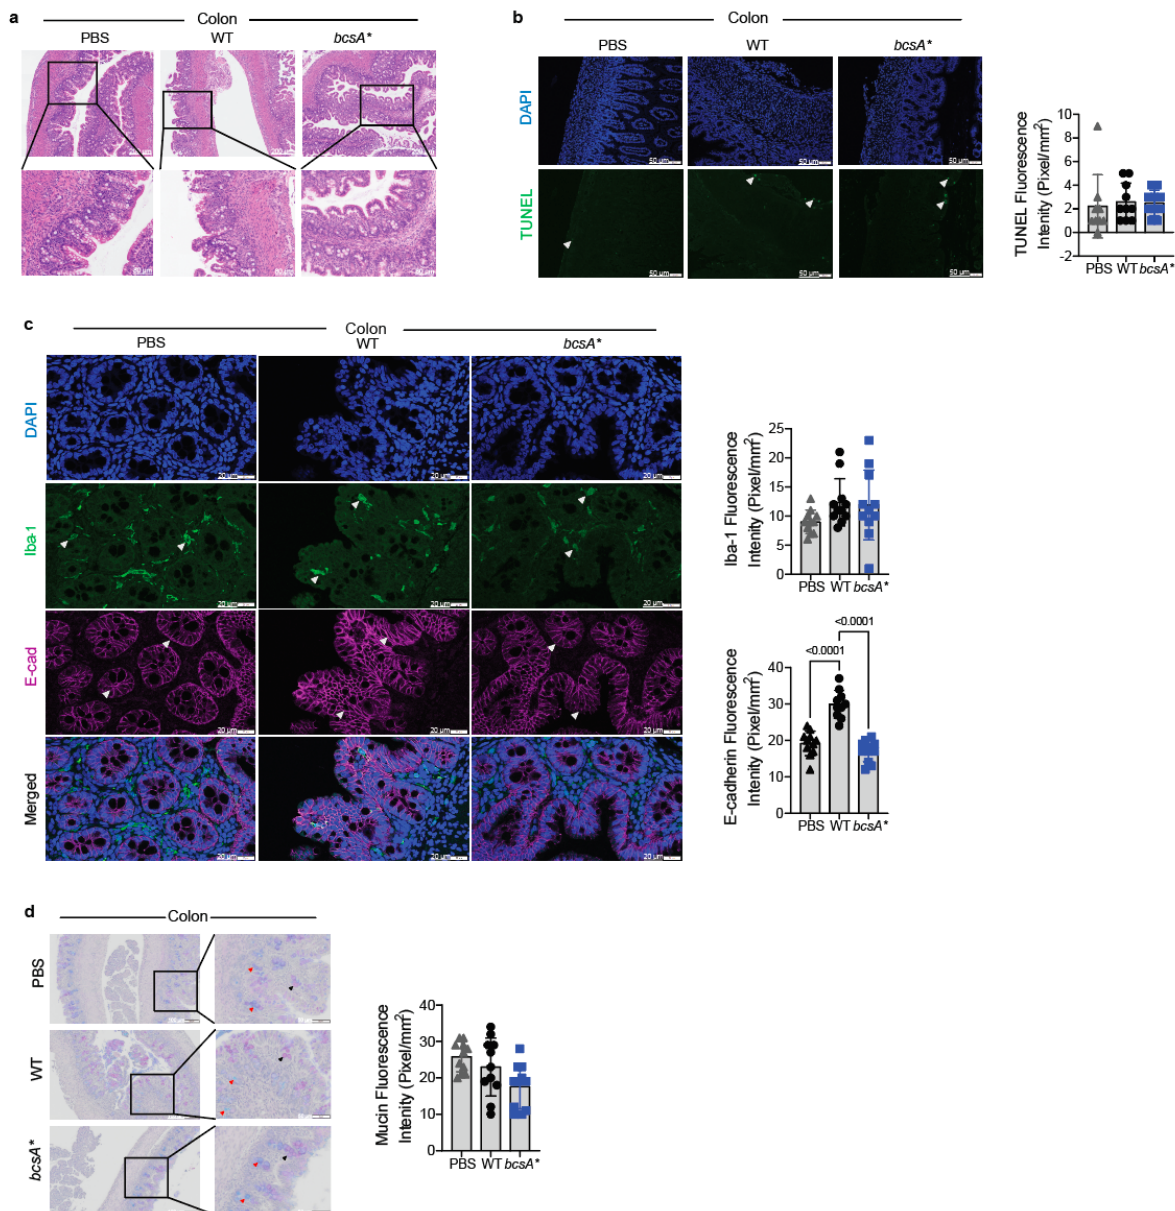

98

99

**Supplementary Fig 8. Cellulose disruption enhances infection and inflammation in the neonatal rat**

**colon. a**, Representative tissue pathology (H&E) micrographs of mid colon (scale bars-200  $\mu\text{m}$  in top panel

101 **colon. a**, Representative tissue pathology (H&E) micrographs of mid colon (scale bars-200  $\mu\text{m}$  in top panel

102 **colon. a**, Representative tissue pathology (H&E) micrographs of mid colon (scale bars-200  $\mu\text{m}$  in top panel

103 **colon. a**, Representative tissue pathology (H&E) micrographs of mid colon (scale bars-200  $\mu\text{m}$  in top panel

104 **colon. a**, Representative tissue pathology (H&E) micrographs of mid colon (scale bars-200  $\mu\text{m}$  in top panel

105 **colon. a**, Representative tissue pathology (H&E) micrographs of mid colon (scale bars-200  $\mu\text{m}$  in top panel

106 **colon. a**, Representative tissue pathology (H&E) micrographs of mid colon (scale bars-200  $\mu\text{m}$  in top panel

107 **colon. a**, Representative tissue pathology (H&E) micrographs of mid colon (scale bars-200  $\mu\text{m}$  in top panel

108 **colon. a**, Representative tissue pathology (H&E) micrographs of mid colon (scale bars-200  $\mu\text{m}$  in top panel

with PBS, WT and *bcsA\**. Data are presented as mean  $\pm$  SD (one-way ANOVA, two-three independent experiments, n=4-10). Source data are provided as a Source Data file.

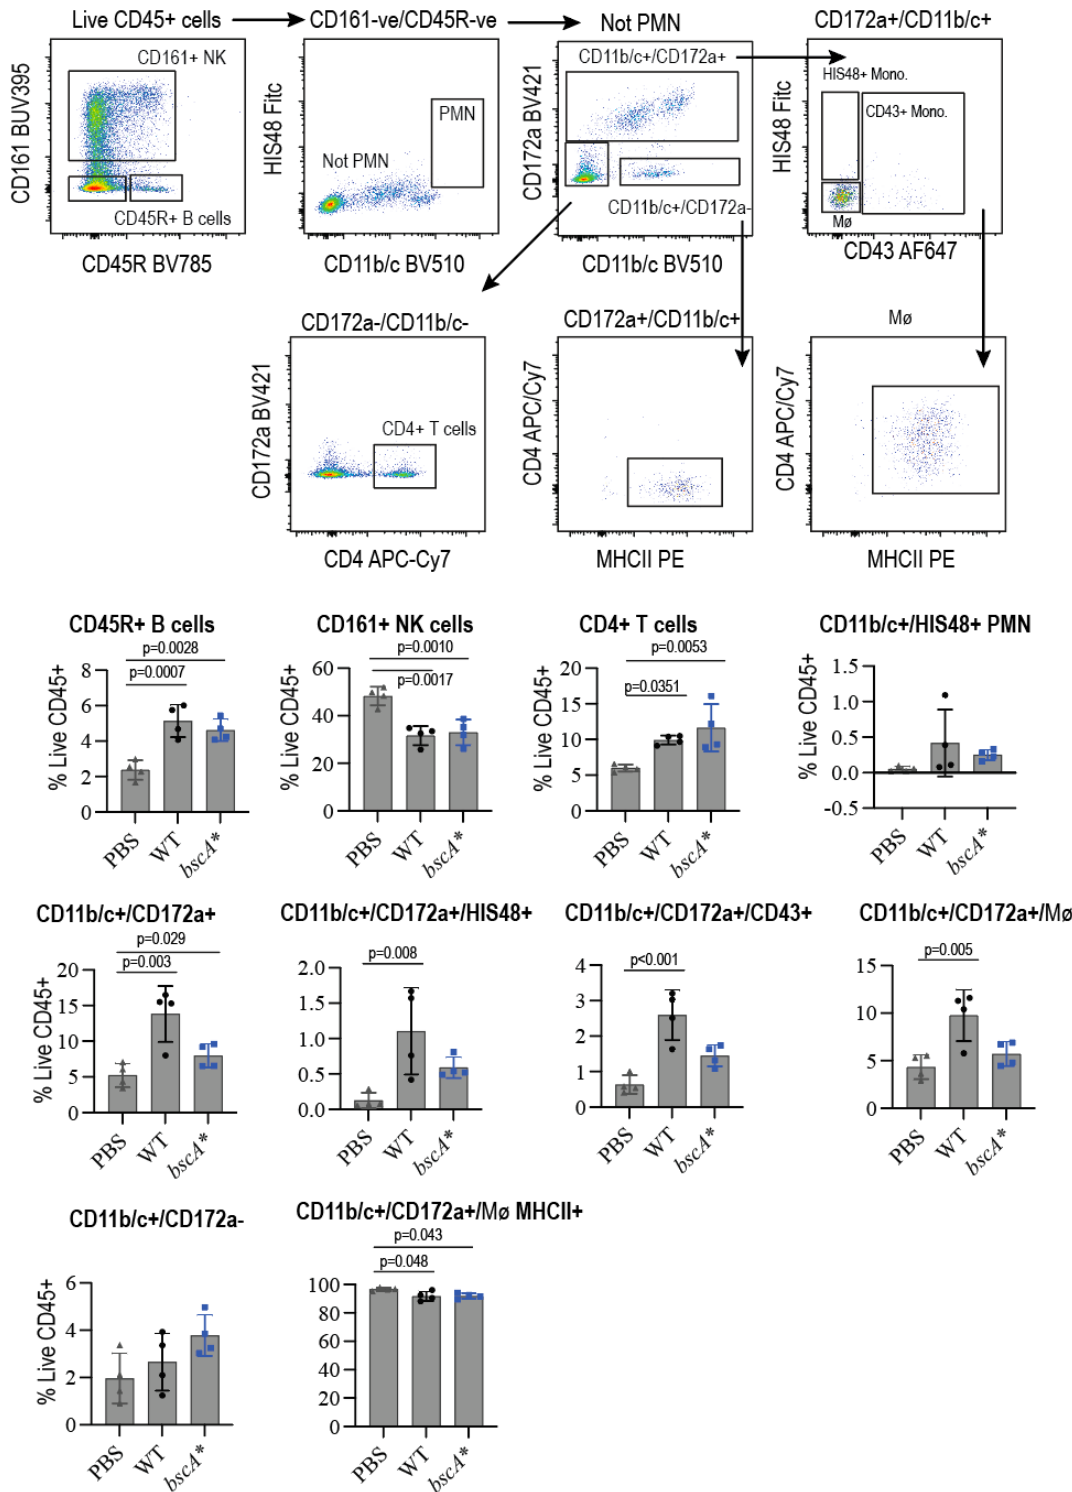

109  
110  
111  
112  
113  
114  
115  
116  
117  
118

**Supplementary Fig 9. Immune response in the neonatal rat colon.** Flow cytometry gating strategy for identification and phenotyping of colon leukocytes, representative dot plots. NK cells were defined as CD161+, B cells as CD45R+ (B220) and neutrophils (PMN) as CD11b/cHi/CD172aLow (HIS48+). CD172aHi myeloid cells were gated to distinguish macrophages (CD4+ cells lacking monocyte markers), HIS48+ classical monocytes and CD43+ non-classical monocytes. CD4+ T cells were gated as a subset of non-NK, B, PMN and myeloid cells. **d**, Relative frequency of colon NK, B, T, polymorphonuclear (PMN) cells; monocyte and macrophage subsets and macrophage MHCII expression. Data are presented as mean  $\pm$  SD (n=4). P-value are only shown for significant difference, determined by One-way ANOVA with Tukey's multiple comparison test. Source data are provided as a Source Data file.

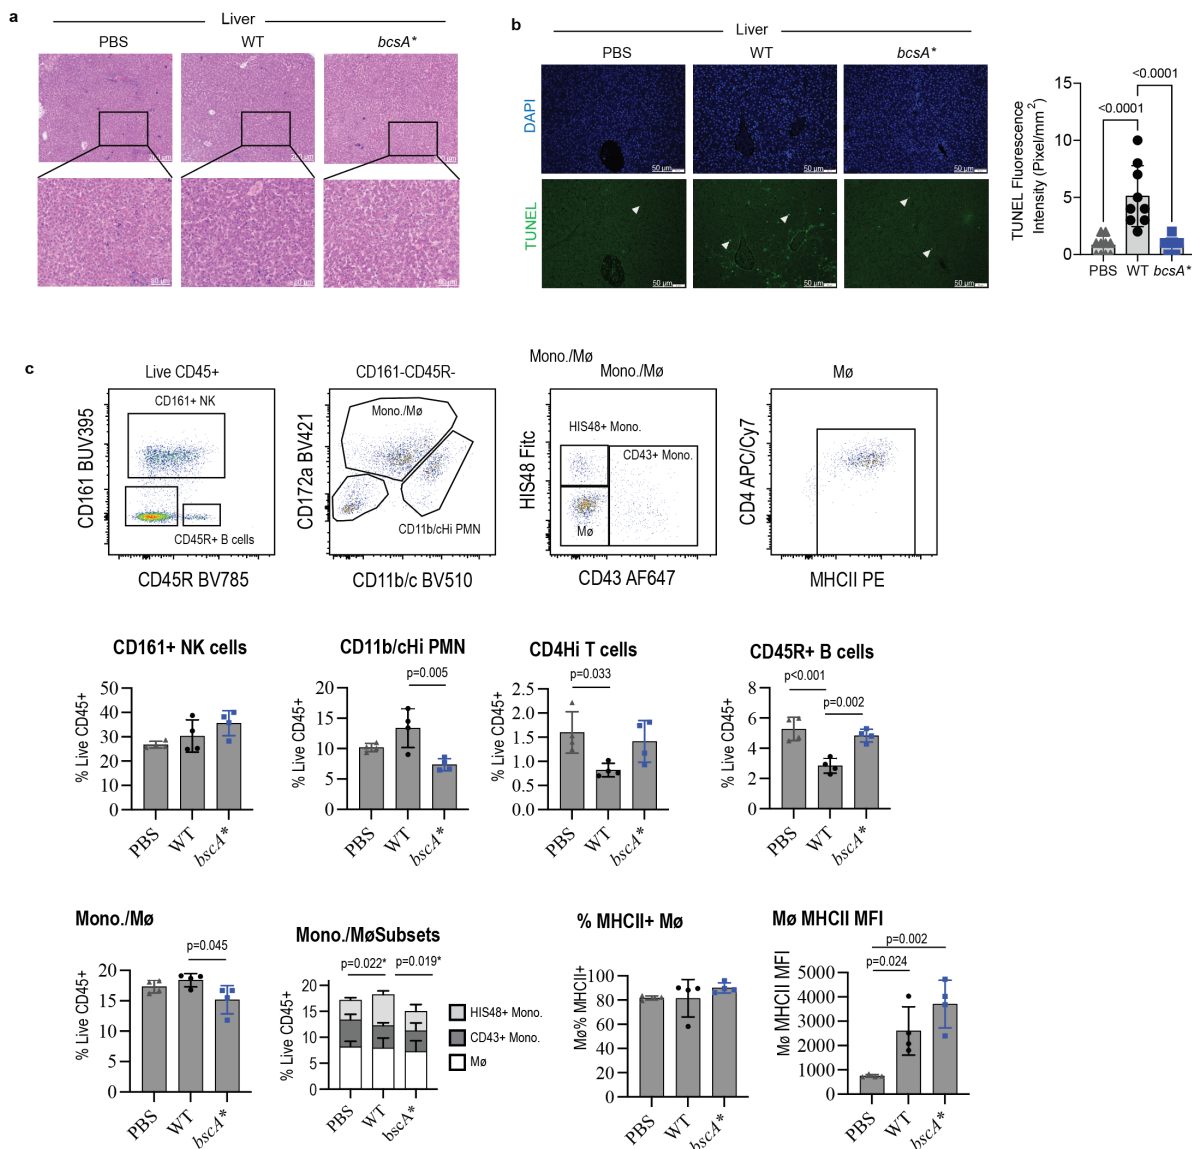

119

120 **Supplementary Fig 10. Cellulose disruption induces hepatic inflammation and cell death. a,**

121 Representative tissue pathology (H&E) micrographs of the liver. **b,** Apoptosis (TUNEL) staining images

122 and quantification showing relative cell death in the liver (n=4-10). **c,** Flow cytometry gating strategy for

123 identification and phenotyping of liver leukocytes, representative dot plots (n=4). NK cells were defined as

124 CD161+ and B cells as CD45R+ (B220). Few neutrophils (PMN), gated as

125 CD11b/cHi/CD172aLow/HIS48+, were identified. The remaining myeloid cells fell into

126 CD172a+/CD11b/c+ monocytes (HIS48+ classical and CD43+ non-classical) and macrophages (CD43-

127 /HIS48-/CD4+/MHCII+) and a population of CD11b/c+/CD172a- cells, the majority of which were

128 MHCII+. Relative frequency of liver NK, B, T, polymorphonuclear (PMN) cells; monocyte and

129 macrophage subsets and macrophage MHCII expression. Data are presented as mean  $\pm$  SD. P-values were

130 calculated with one-way ANOVA with Tukey's multiple comparison test. Source data are provided as a

131 Source Data file.

132

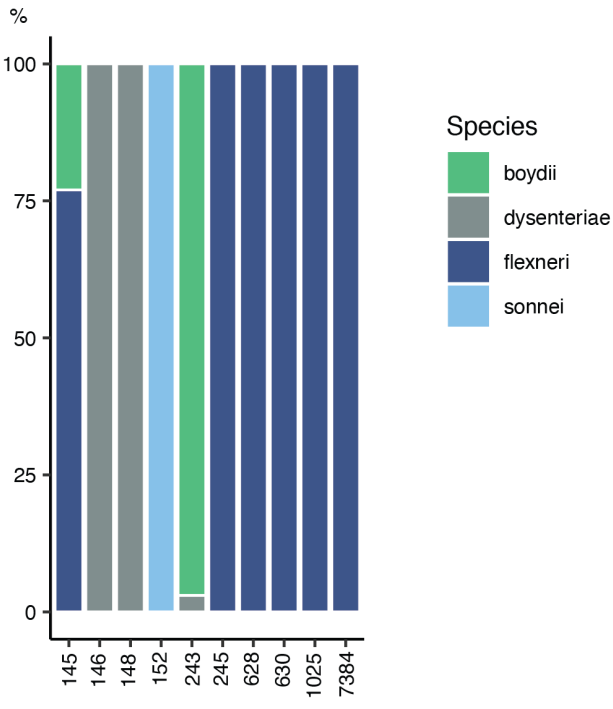

133

134 **Supplementary Fig 11.** Cellulose disruption mutations in *Shigella* spp. *Shigella flexneri* ST245, ST628,  
 135 ST630, ST1025 and ST7384 possess a nonsense mutation in BcsA, *Shigella sonnei* ST152 contain nonsense  
 136 mutations in both BcsA and BcsC, and *Shigella dysenteriae* ST146 and ST148 contain nonsense mutations  
 137 in BcsC, BcsE and BcsG. Source data are provided as a Source Data file.

138

139

140

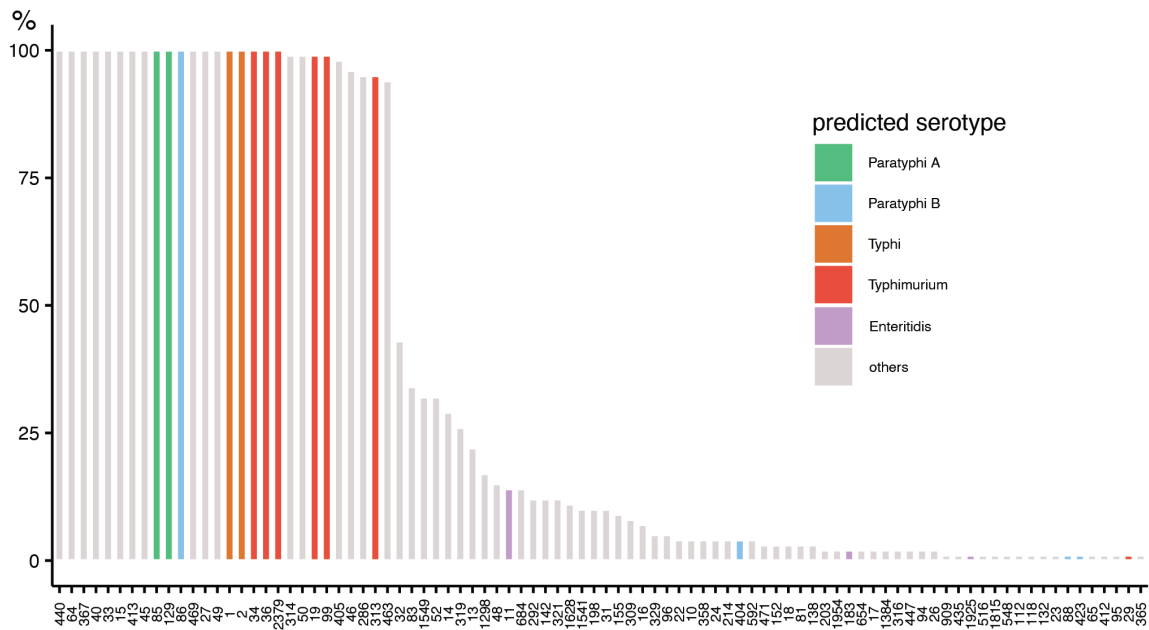

141

142 **Supplementary Fig 12.** Cellulose disruption mutations in *Salmonella* spp. All *S. Typhimurium* STs  
 143 examined (except ST29) contain disruption mutations in the BcsG pEtN transferase, including 88%  
 144 (88/100) of the African-endemic invasive nontyphoid bacteremia ST313 clone. In human-restricted *S.*  
 145 *enterica* serovars causing typhoid fever (*S. Typhi*) and paratyphoid fever (*S. Paratyphi* A, B and C), loss-  
 146 of-function mutations in cellulose genes are present in most STs, including a nonsense mutation in the *bcsA*  
 147 gene in the most abundant *S. Typhi* ST1 and ST2 lineages. Similarly, all *S. Paratyphi* A strains examined  
 148 from ST85 and ST129 contain a loss-of-function mutation in the *bcsA* gene, while all *S. Paratyphi* B *sensu*  
 149 *stricto* strains examined from ST86 contain a nonsense mutation in the *bcsC* gene. In contrast, cellulose  
 150 disruption mutations were rare in strains belonging to *S. Paratyphi* B *Java*, the other biotype of the *S.*  
 151 *Paratyphi* B complex that causes non-invasive gastroenteritis. Source data are provided as a Source Data  
 152 file.

153

154

155

156
