# Supplementary material for: A convergent evolutionary pathway attenuating cellulose production drives enhanced virulence of some bacteria
Source: PubMed Central journal article supplement (PMC10881479; doi:10.1038/s41467-024-45176-4), 2024-02-21
Supplement: 41467_2024_45176_MOESM3_ESM.pdf [file 41467_2024_45176_MOESM3_ESM.pdf]

## **Description of Additional Supplementary Files**

File Name: Supplementary Data 1

Description: ST95 genomes used in the study

File Name: Supplementary Data 2

Description: Gene content of genomic islands (GIs) in MS7163 and UTI89

File Name: Supplementary Data 3

Description: Prevalence of cellulose disrupted mutations in most common *E. coli* STs

File Name: Supplementary Data 4

Description: Prevalence of cellulose disrupted mutations in most common *Shigella* spp. STs

File Name: Supplementary Data 5

Description: Prevalence of cellulose disrupted mutations in most common *Salmonella* spp. STs

File Name: Supplementary Data 6

Description: Strains and primers used in the study

File Name: Supplementary Data 7

Description: Accession numbers of *E. coli*, *Shigella* and *Salmonella* used in the study
